# Supplementary material for: A cryptic pocket in METTL3-METTL14 regulates m6A conversion and sensing
Source: Research Square preprint supplement (doi:10.21203/rs.3.rs-3150186/v1), 2023-08-08
Supplement: Supplementary file 1 [file 2b6e801f3b68ac0ae2f6c0cf.pdf]

## **Extended data**

### **A cryptic pocket in METTL3-METTL14 regulates m<sup>6</sup>A conversion and sensing**

Shan Qi<sup>1,2</sup>, Yogesh K. Gupta<sup>1, 2\*</sup>

<sup>1</sup> Greehey Children's Cancer Research Institute, University of Texas Health Science Center at  
San Antonio, 8403 Floyd Curl Drive, San Antonio, TX 78229, USA

<sup>2</sup> Department of Biochemistry and Structural Biology, University of Texas Health Science Center  
at San Antonio, 7703 Floyd Curl Drive, San Antonio, TX 78229, USA

\*Corresponding author:

Y.K.G. email: [guptay@uthscsa.edu](mailto:guptay@uthscsa.edu)

This file contains the following material:

1. Extended data Table 1
2. Extended data Figure 1 and legends

**Table 1. Data collection and refinement statistics (molecular replacement)**

|                                                             |                                     |
|-------------------------------------------------------------|-------------------------------------|
|                                                             | METTTL3-METTTL14-m6A<br>(PDB: 8TDS) |
| <b>Data collection</b>                                      |                                     |
| Wavelength (Å)                                              | 1.033                               |
| Space Group                                                 | P4 <sub>1</sub> 2 <sub>1</sub> 2    |
| Cell dimensions                                             |                                     |
| a=b, c (Å)                                                  | 95.98, 121.61                       |
| $\alpha=\beta=\gamma$ (°)                                   | 90                                  |
| Resolution (Å)                                              | 2.5                                 |
| R-merge (%)                                                 | 18.8 (156)*                         |
| <i>I</i> / $\sigma$ <i>I</i>                                | 10.6 (1.76)                         |
| Completeness (%)                                            | 100 (100)                           |
| Redundancy                                                  | 9.7 (10.3)                          |
| CC1/2                                                       | 0.99 (0.50)*                        |
| Wilson B-factor                                             | 47                                  |
| <b>Refinement</b>                                           |                                     |
| Resolution (Å)                                              | 37.34 – 2.5                         |
| Number of reflections                                       | 20306 (2238)                        |
| <i>R</i> <sub>work</sub> (%) / <i>R</i> <sub>free</sub> (%) | 23 / 26.2                           |
| Nonhydrogen atoms                                           |                                     |
| Protein                                                     | 3986                                |
| Ligands                                                     | 32                                  |
| Water                                                       | 90                                  |
| Average B-factors (Å <sup>2</sup> )                         |                                     |
| Protein                                                     | 53.2                                |
| Ligands (m <sup>6</sup> AMP)                                | 70.9                                |
| Water                                                       | 47.3                                |
| Root mean square deviations                                 |                                     |
| Bond lengths (Å)                                            | 0.016                               |
| Bond angles (°)                                             | 1.4                                 |
| Ramachandran favored (%)                                    | 94.6                                |
| Ramachandran allowed (%)                                    | 4                                   |
| Ramachandran outliers (%)                                   | 1.4                                 |

\*Values for outermost shell are given in parentheses.

## Extended data Figure 1

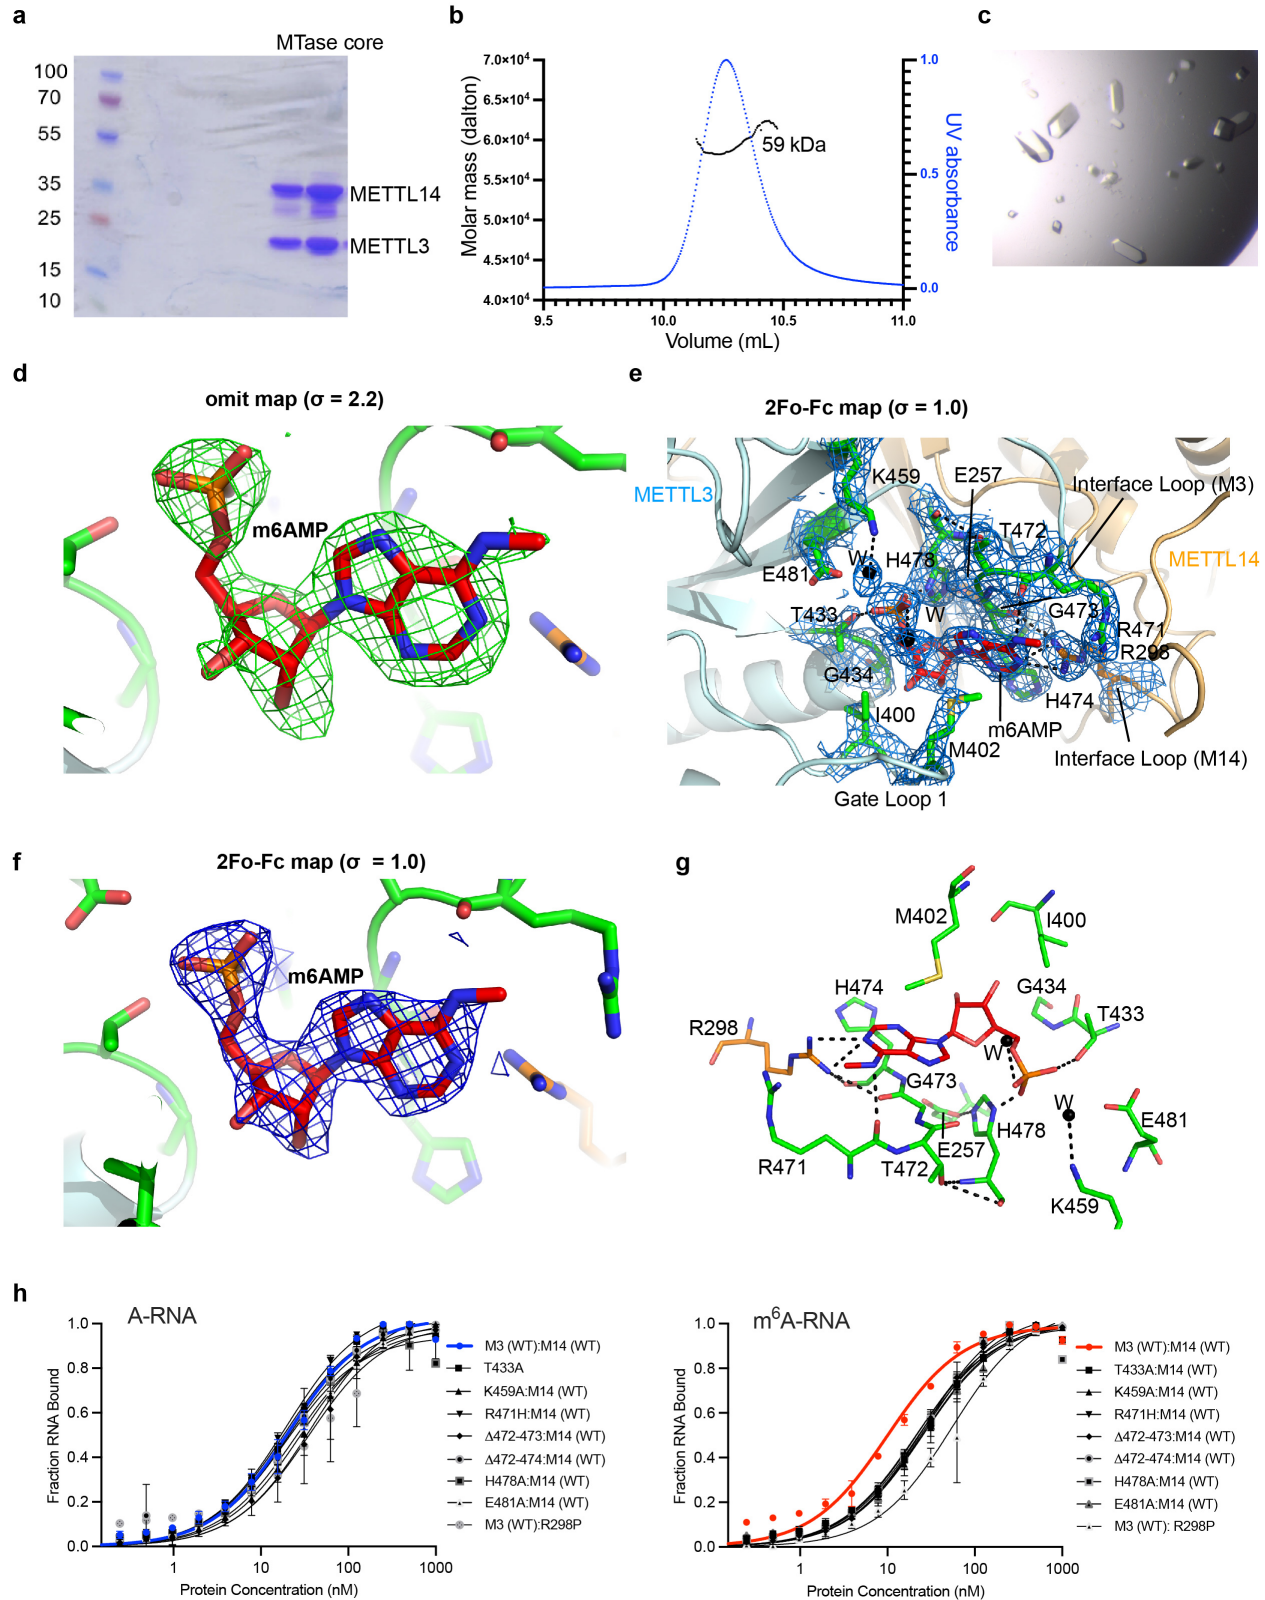

**Extended data Figure 1 | a**, Coomassie-stained SDS-PAGE showing high purity of METTL3-METTL14 MTase core. **b**, Size-exclusion chromatography coupled with multi-angle scattering estimated a molecular mass of this complex of ~59 kDa, in excellent agreement with theoretical mass (~ 60 kDa). **c**, crystals of METTL3-METTL14 MTase core used for soaking *N*<sup>6</sup>-methyladenosine monophosphate (m<sup>6</sup>AMP or m<sup>6</sup>A). **d**, A green mesh showing an unbiased electron density omit map countered at 2.2σ, confirming the presence of m<sup>6</sup>A. **e-f**, A blue mesh representing a 2Fo-Fc map (σ = 1.0) showing the final refinement of the m<sup>6</sup>A-METTL3-METTL14 structure. The map confirms the excellent agreement between calculated and observed electron density for the region surrounding m<sup>6</sup>A and for m<sup>6</sup>A itself (**f**). **g**, Network of interaction between m<sup>6</sup>A and residues from METTL3 (green) and METTL14 (orange). **g**, Quantitative measurement of 30-mer RNA (left panel, A-RNA; right panel, m<sup>6</sup>A-RNA) binding (n = 3) to the WT and mutant enzymes shown as binding isotherms fitted with a one-site specific binding model, ( $Y = B_{\text{max}} * X / (K_d + X)$ ). The equilibrium dissociation constant ( $K_d$ ) was derived from three independent experiments, with error bars indicating the range of data points (n = 3). m<sup>6</sup>A replaces the central adenine base within the GGACU motif in A-RNA in m<sup>6</sup>A-RNA. See the methods section and source data for details.
